# Supplementary material for: Plasma 1-deoxysphingolipids are early predictors of incident type 2 diabetes mellitus
Source: PubMed Central journal article supplement (PMC5417440; doi:10.1371/journal.pone.0175776), 2017-05-04
Supplement: pone.0175776.s001.pdf [file pone.0175776.s001.pdf]

**S1 Table** Pearson correlation coefficients for the analyzed sphingoid bases, clinical chemistry, and anthropometric variables

| Coef.               | C <sub>16</sub> SO | C <sub>16</sub> SA | C <sub>17</sub> SO | C <sub>18</sub> PhytoSO | C <sub>18</sub> SA diene | C <sub>18</sub> SO | C <sub>18</sub> SA | SL total     | C <sub>19</sub> SO | C <sub>20</sub> SO | C <sub>20</sub> SA | deoxySO      | deoxySA      | deoxySL total |
|---------------------|--------------------|--------------------|--------------------|-------------------------|--------------------------|--------------------|--------------------|--------------|--------------------|--------------------|--------------------|--------------|--------------|---------------|
| Age                 | <b>0.17</b>        | 0.02               | <b>0.18</b>        | 0.04                    | <b>0.18</b>              | 0.07               | 0.01               | 0.06         | <b>0.15</b>        | <b>0.10</b>        | 0.05               | <b>0.15</b>  | 0.07         | <b>0.13</b>   |
| BMI                 | 0.00               | <b>0.10</b>        | -0.06              | <b>-0.19</b>            | 0.05                     | -0.07              | <b>0.13</b>        | -0.06        | -0.03              | -0.01              | <b>0.10</b>        | <b>0.13</b>  | <b>0.15</b>  | <b>0.14</b>   |
| Waist circumference | -0.07              | 0.06               | <b>-0.16</b>       | <b>-0.21</b>            | <b>-0.14</b>             | <b>-0.12</b>       | <b>0.12</b>        | <b>-0.11</b> | -0.06              | 0.03               | <b>0.12</b>        | <b>0.27</b>  | <b>0.24</b>  | <b>0.27</b>   |
| WHR                 | <b>-0.16</b>       | 0.00               | <b>-0.26</b>       | <b>-0.13</b>            | <b>-0.30</b>             | <b>-0.14</b>       | 0.08               | <b>-0.12</b> | <b>-0.12</b>       | 0.05               | <b>0.11</b>        | <b>0.30</b>  | <b>0.24</b>  | <b>0.29</b>   |
| Cholesterol         | <b>0.55</b>        | <b>0.46</b>        | <b>0.51</b>        | <b>0.48</b>             | <b>0.55</b>              | <b>0.72</b>        | <b>0.56</b>        | <b>0.73</b>  | <b>0.27</b>        | <b>0.43</b>        | <b>0.29</b>        | <b>0.36</b>  | <b>0.44</b>  | <b>0.39</b>   |
| LDL-C               | <b>0.45</b>        | <b>0.40</b>        | <b>0.47</b>        | <b>0.45</b>             | <b>0.47</b>              | <b>0.68</b>        | <b>0.51</b>        | <b>0.69</b>  | <b>0.27</b>        | <b>0.42</b>        | <b>0.24</b>        | <b>0.20</b>  | <b>0.28</b>  | <b>0.23</b>   |
| HDL-C               | <b>0.38</b>        | <b>0.12</b>        | <b>0.36</b>        | <b>0.20</b>             | <b>0.47</b>              | <b>0.39</b>        | <b>0.13</b>        | <b>0.38</b>  | <b>0.15</b>        | <b>0.15</b>        | 0.05               | -0.06        | -0.05        | -0.06         |
| TG                  | 0.02               | <b>0.13</b>        | <b>-0.10</b>       | 0.04                    | <b>-0.09</b>             | -0.06              | <b>0.14</b>        | -0.05        | <b>-0.09</b>       | 0.00               | <b>0.12</b>        | <b>0.53</b>  | <b>0.54</b>  | <b>0.55</b>   |
| Glucose             | -0.04              | 0.04               | <b>-0.12</b>       | 0.01                    | <b>-0.11</b>             | -0.05              | <b>0.08</b>        | -0.04        | <b>-0.12</b>       | 0.04               | <b>0.11</b>        | <b>0.15</b>  | <b>0.13</b>  | <b>0.14</b>   |
| Insulin             | -0.02              | <b>0.08</b>        | <b>-0.11</b>       | <b>-0.16</b>            | <b>-0.14</b>             | <b>-0.19</b>       | <b>0.09</b>        | <b>-0.17</b> | -0.03              | 0.00               | <b>0.09</b>        | <b>0.20</b>  | <b>0.19</b>  | <b>0.20</b>   |
| HOMA-IR             | -0.03              | <b>0.08</b>        | <b>-0.12</b>       | <b>-0.15</b>            | <b>-0.15</b>             | <b>-0.19</b>       | <b>0.09</b>        | <b>-0.17</b> | -0.05              | 0.00               | <b>0.11</b>        | <b>0.21</b>  | <b>0.20</b>  | <b>0.21</b>   |
| Systolic BP         | 0.04               | <b>0.09</b>        | -0.01              | 0.08                    | 0.01                     | 0.04               | <b>0.13</b>        | 0.04         | -0.04              | 0.02               | <b>0.13</b>        | <b>0.17</b>  | <b>0.15</b>  | <b>0.17</b>   |
| Diastolic BP        | 0.05               | <b>0.14</b>        | -0.02              | 0.00                    | -0.01                    | 0.06               | <b>0.18</b>        | 0.07         | -0.06              | 0.04               | <b>0.14</b>        | <b>0.17</b>  | <b>0.19</b>  | <b>0.18</b>   |
| Adiponectin         | <b>0.22</b>        | 0.02               | <b>0.23</b>        | <b>0.09</b>             | <b>0.32</b>              | <b>0.16</b>        | 0.00               | <b>0.15</b>  | <b>0.12</b>        | 0.03               | <b>-0.09</b>       | <b>-0.12</b> | <b>-0.13</b> | <b>-0.13</b>  |
| Leptin              | <b>0.17</b>        | <b>0.17</b>        | <b>0.18</b>        | <b>-0.09</b>            | <b>0.25</b>              | 0.04               | <b>0.16</b>        | 0.05         | <b>0.14</b>        | 0.02               | <b>0.10</b>        | 0.01         | 0.04         | 0.02          |
| ALT                 | <b>-0.13</b>       | 0.05               | <b>-0.23</b>       | <b>-0.14</b>            | <b>-0.25</b>             | <b>-0.16</b>       | <b>0.11</b>        | <b>-0.15</b> | <b>-0.14</b>       | 0.00               | <b>0.11</b>        | <b>0.16</b>  | <b>0.13</b>  | <b>0.16</b>   |
| AST                 | -0.06              | <b>0.09</b>        | <b>-0.18</b>       | 0.02                    | <b>-0.20</b>             | <b>-0.10</b>       | <b>0.18</b>        | <b>-0.08</b> | <b>-0.14</b>       | 0.03               | <b>0.12</b>        | <b>0.23</b>  | <b>0.22</b>  | <b>0.24</b>   |
| GGT                 | <b>-0.10</b>       | 0.07               | <b>-0.24</b>       | -0.06                   | <b>-0.24</b>             | <b>-0.09</b>       | <b>0.16</b>        | -0.08        | <b>-0.16</b>       | 0.00               | <b>0.15</b>        | <b>0.32</b>  | <b>0.27</b>  | <b>0.32</b>   |
| CR                  | -0.05              | -0.03              | -0.07              | -0.06                   | <b>-0.16</b>             | -0.06              | -0.02              | -0.06        | -0.04              | 0.04               | -0.01              | <b>0.16</b>  | <b>0.13</b>  | <b>0.15</b>   |

ALT, alanine transaminase; ASP, aspartate transaminase; BMI, body mass index; GGT, gamma-glutamyl transpeptidase; LDL-C, low-density lipoprotein cholesterol; HDL-C, high-density lipoprotein cholesterol; TG, triglycerides; HOMA-IR, homeostatic model assessment of insulin resistance; SA, sphinganine; SO, sphingosine; WHR, waist-hip ratio. Statistically significant associations are indicated in bold
