# Supplementary material for: Plasma 1-deoxysphingolipids are early predictors of incident type 2 diabetes mellitus
Source: PubMed Central journal article supplement (PMC5417440; doi:10.1371/journal.pone.0175776), 2017-05-04
Supplement: pone.0175776.s002.pdf [file pone.0175776.s002.pdf]

**S2 Table** Areas under the curves as measurement for the predictive value of different parameters for incident T2DM, stratified by BMI category

| <b>BMI cut-off</b> | <b>Glucose</b> | <b>doxSA</b> | <b>Glucose + doxSA</b> | <b>delta AUC<br/>(Glucose vs Glucose + doxSA)</b> |
|--------------------|----------------|--------------|------------------------|---------------------------------------------------|
| ≤25                | 0.690          | 0.644        | 0.740                  | 0.050                                             |
| ≤26                | 0.694          | 0.636        | 0.736                  | 0.041                                             |
| ≤27                | 0.685          | 0.620        | 0.712                  | 0.028                                             |
| ≤28                | 0.657          | 0.602        | 0.676                  | 0.019                                             |
| ≤29                | 0.654          | 0.583        | 0.671                  | 0.018                                             |
| ≤30                | 0.649          | 0.579        | 0.666                  | 0.016                                             |
| ≤31                | 0.661          | 0.574        | 0.670                  | 0.009                                             |
| ≤33                | 0.660          | 0.582        | 0.673                  | 0.013                                             |
| ≤35                | 0.670          | 0.581        | 0.679                  | 0.009                                             |

All models adjusted for glucose, TG, doxSO, doxSA, doxSL, glucose + doxSO, glucose + doxSA, glucose + doxSL, glucose + TG, glucose + TG + doxSL.
