# Supplementary material for: Plasma 1-deoxysphingolipids are early predictors of incident type 2 diabetes mellitus
Source: PubMed Central journal article supplement (PMC5417440; doi:10.1371/journal.pone.0175776), 2017-05-04
Supplement: pone.0175776.s003.pdf [file pone.0175776.s003.pdf]

**S4 Table.** Areas under the curves as measurement for the predictive value of different parameters for incident T2DM, participants with a BMI  $\geq 30$  kg/m<sup>2</sup>

| <b>Parameter</b>                 | <b>Area</b> | <b>Std. Error</b> | <b>p-value</b> |
|----------------------------------|-------------|-------------------|----------------|
| <b>Glucose</b>                   | 0.781       | 0.031             | 9.41E-13       |
| <b>doxSA</b>                     | 0.620       | 0.038             | 0.002          |
| <b>Waist-hip-ratio</b>           | 0.627       | 0.038             | 0.001          |
| <b>Glucose + doxSA</b>           | 0.785       | 0.031             | 4.67E-13       |
| <b>Glucose + adiponectin</b>     | 0.802       | 0.029             | 1.78E-14       |
| <b>Glucose + waist-hip ratio</b> | 0.795       | 0.030             | 6.26E-14       |
