# Supplementary material for: Plasma 1-deoxysphingolipids are early predictors of incident type 2 diabetes mellitus
Source: PubMed Central journal article supplement (PMC5417440; doi:10.1371/journal.pone.0175776), 2017-05-04
Supplement: pone.0175776.s004.pdf [file pone.0175776.s004.pdf]

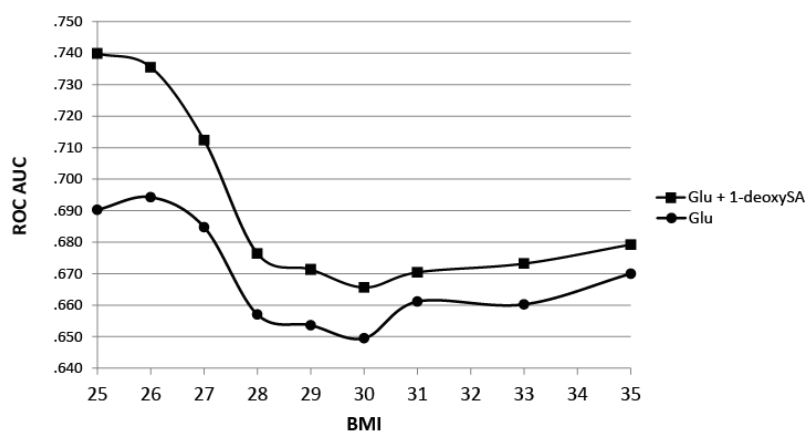

**S3 Figure** AUC values for glucose (blue) and glucose + 1-deoxySA (green), obtained in ROC curve analyses at different arbitrary BMI cut-offs. The AUC for incident T2DM of glucose + 1-deoxySA (green) is larger than that of glucose alone, especially at low BMI values < 27, and converges at higher BMIs.
